# Supplementary material for: Divergent axial morphogenesis and early shh expression in vertebrate prospective floor plate
Source: PubMed Central journal article supplement (PMC5791209; doi:10.1186/s13227-017-0090-x), 2018-01-31

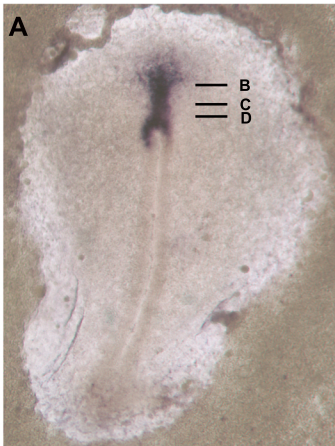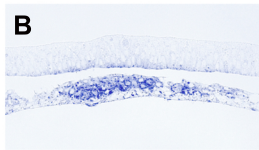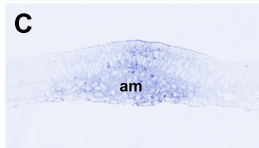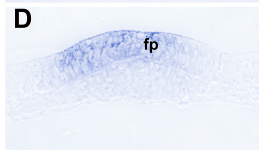

Supplement: 13227_2017_90_MOESM1_ESM.pdf [file 13227_2017_90_MOESM1_ESM.pdf]
