# Supplementary material for: Divergent axial morphogenesis and early shh expression in vertebrate prospective floor plate
Source: PubMed Central journal article supplement (PMC5791209; doi:10.1186/s13227-017-0090-x), 2018-01-31

**A**

dorsal

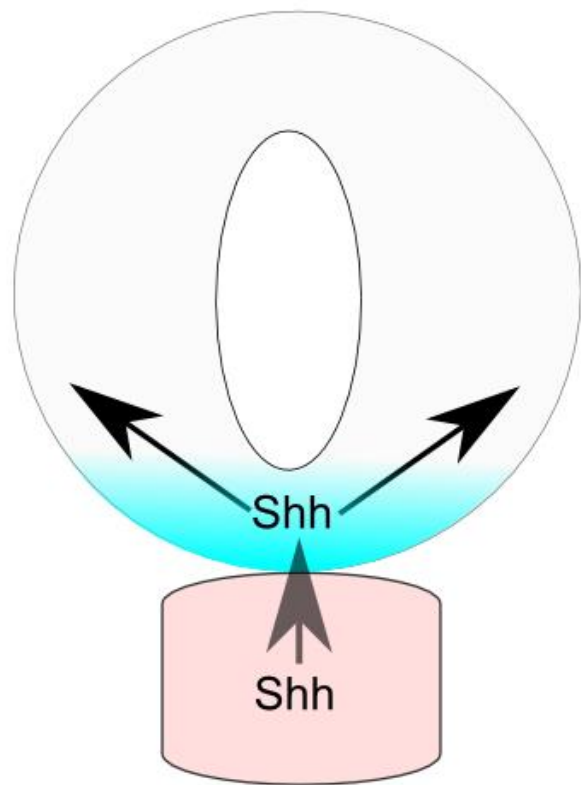

ventral

**B**

left

right

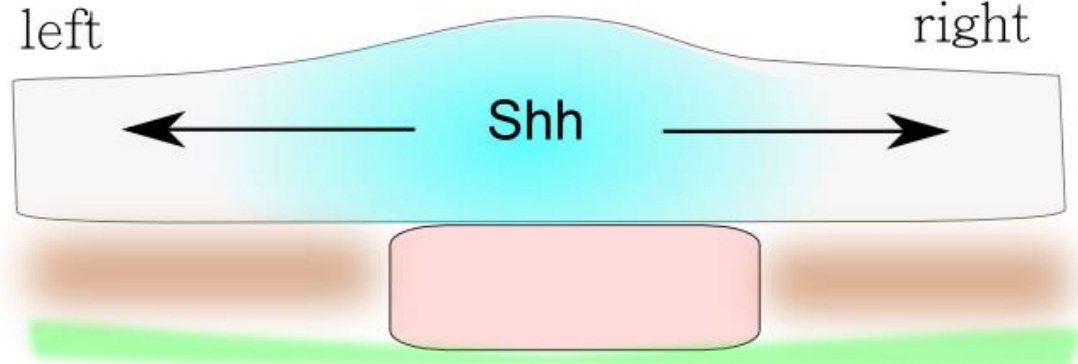

Supplement: 13227_2017_90_MOESM3_ESM.pdf [file 13227_2017_90_MOESM3_ESM.pdf]
