# Supplementary material for: Divergent axial morphogenesis and early shh expression in vertebrate prospective floor plate
Source: PubMed Central journal article supplement (PMC5791209; doi:10.1186/s13227-017-0090-x), 2018-01-31
Supplement: 13227_2017_90_MOESM4_ESM.pdf [file 13227_2017_90_MOESM4_ESM.pdf]

## ***Shh* expression domains in equivalent structures**

| <b>species</b> | <b>domain</b>                               | <b>expression</b>                                                               |
|----------------|---------------------------------------------|---------------------------------------------------------------------------------|
| <i>chicken</i> | dorsal organizer: the pit area of the node  | positive prior to mesoderm formation; negative after stage 4+                   |
| <i>chicken</i> | dorsal organizer: anterior and lateral node | initially positive; right side: negative after stage 5-                         |
| <i>chicken</i> | notochord                                   | posterior: negative at the beginning of notochord formation; anterior: positive |
| <i>chicken</i> | floor plate/midline neuroectoderm           | positive in the middle and posterior area; negative in the forebrain            |
| <i>Xenopus</i> | dorsal blastopore /organizer                | positive at early gastrula                                                      |
| <i>Xenopus</i> | notochord                                   | positive at studied stages                                                      |
| <i>Xenopus</i> | floor plate/midline neuroectoderm           | negative at gastrula stages; positive from neurula incl. forebrain              |
| <i>rabbit</i>  | node                                        | positive at studied stages                                                      |
| <i>rabbit</i>  | notochord                                   | positive at studied stages                                                      |
| <i>rabbit</i>  | floor plate/midline neuroectoderm           | negative at the begin of the notochord formation, later positive                |
